# Supplementary material
Source: Springer Nature journal article supplement (https://www.springermedizin.de/resource/supplementary/12984_2012_406_MOESM3_ESM.pdf/9605942)

**ND Arm**

90°

**No Load**

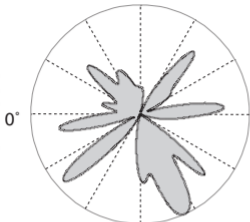

**D Arm**

90°

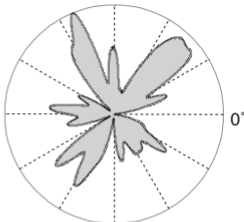

270°

90°

**With Load**

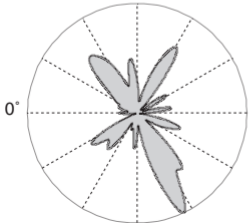

270°

90°

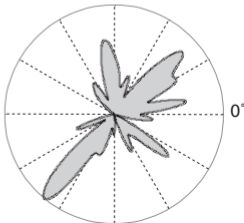

Supplement: MOESM3 [file 9605942]
